# Supplementary material for: Trends, Symptoms, and Outcomes of Resectable Giant Mediastinal Tumors
Source: Front Oncol. 2022 Feb 4;12:820720. doi: 10.3389/fonc.2022.820720 (PMC8854276; doi:10.3389/fonc.2022.820720)
Supplement: Supplementary file 2 [file Table_1.xlsx]

## Sheet: Sheet1
Case_report_Num	First_Author	PMID	Published_Year	Country	Age	Gender	Site	Surgical_Approaches	piecemeal_manner (Otherwise en bloc)	Size1	Size2	Size3	weight(g)	Blood_loss(ml)	Operation_time(min)	Dignosis	Complication	Length_of_stay(Days)
1	Yasuto Sakaguchi	PMID:30783828	2019	Japan	38	male	anterior	sternotomy	0	10	7	6	Not reported.	521	288	thymoma	0	26
2	Manouchehr Aghajanzadeh	PMID:30598961	2018	Iran	35	male	anterior	posterolateral thoracotomy	0	31	21	8	5000	Not reported.	Not reported.	thymolipoma	0	5
3	Tyler J. Loftus	PMID:30439671	2018	USA	57	female	posterior	posterolateral thoracotomy	1	13	Not reported.	Not reported.	Not reported.	Not reported.	Not reported.	schwannoma	0	4
4	Yu-Shang Yang	PMID:30335003	2018	China	63	male	anterior	thoracotomy	0	22	16	11	1575	Not reported.	Not reported.	liposarcoma	0	Not reported.
5	Haining Zhou	PMID:29268428	2017	China	69	female	posterior	VATS	0	12	8	Not reported.	Not reported.	Not reported.	Not reported.	lymphangioma	0	Not reported.
6	Yasoo Sugiura	PMID:29127917	2017	Japan	50	male	anterior	clam shell approach	0	31	21	Not reported.	3500	Not reported.	Not reported.	liposarcoma	Not reported.	10
7	Andrea Galli	PMID:29236275	2017	Italy	55	male	anterior	sternotomy	0	15.5	15	3.5	Not reported.	Not reported.	Not reported.	liposarcoma	0	8
8	Mujtaba Mubashir	PMID:29021929	2017	Pakistan	46	male	posterior	thoracotomy	0	12.5	8.5	7.5	Not reported.	Not reported.	Not reported.	schwannoma	0	Not reported.
9	Diego Gonzalez-Rivas	PMID:28740696	2017	Spain	78	male	anterior	VATS	0	12.5	9.5	10	Not reported.	90	105	thymoma	0	1.5
10	Eleeza Raafat	PMID:28668778	2017	USA	61	male	middle	thoracotomy	0	21	21	NA	Not reported.	Not reported.	Not reported.	solitary fibrous tumour	Not reported.	Not reported.
11	Wei Huang	PMID:28044001	2016	China	57	male	anterior	sternotomy+thoracotomy	0	27	20	15	3300	Not reported.	Not reported.	liposarcoma	0	Not reported.
12	Kohei Fujita	PMID:28031857	2016	Japan	17	female	anterior	sternotomy	0	12	Not reported.	Not reported.	Not reported.	Not reported.	Not reported.	teratoma	0	7
13	Peng Liu	PMID:27906066	2016	China	42	female	anterior	thoracotomy	incomplete resection	10	6	6	Not reported.	Not reported.	Not reported.	angiolipoma	0	7
14	Naoki Haratake	PMID:27885214	2017	Japan	42	female	posterior	thoracotomy	0	15	11	5	Not reported.	Not reported.	Not reported.	leiomyoma	0	Not reported.
15	Sai Yendamuri	PMID:27772591	2016	USA	26	male	anterior	sternotomy+thoracotomy	1	Not reported.	Not reported.	Not reported.	Not reported.	Not reported.	Not reported.	teratoma	1	20
16	Weigang Zhao	PMID:27621898	2016	China	46	male	anterior	thoracotomy(hemiclamshell)	0	19	16	15	2135	Not reported.	Not reported.	thymoma	Not reported.	Not reported.
17	Y Wu	PMID:27538560	2016	China	45	male	posterior	thoracotomy	0	20	15	12	1750	Not reported.	Not reported.	schwannoma	0	Not reported.
18	Epameinondas Angelopoulos	PMID:27118974	2016	Greece	73	female	middle	thoracotomy	0	35	18	18	Not reported.	Not reported.	Not reported.	schwannoma	1	30
19	Anton Crnjac	PMID:26834527	2014	Slovenia	68	female	middle	thoracosternotomy (hemiclamshell)	0	22	16	15	Not reported.	1500	Not reported.	solitary fibrous tumour	1	22
20	Seyda Ors Kaya	PMID:26644773	2015	Turkey	56	male	anterior	thoracotomy	0	18	Not reported.	Not reported.	1075	Not reported.	Not reported.	cavernous haemangioma	0	6
21	Guotian Pei	PMID:26557924	2014	China	30	female	anterior	thoracotomy	0	24	21	16	4150	Not reported.	Not reported.	thymolipoma	0	15
22	Naoki Omachi	PMID:26424309	2015	Japan	23	male	anterior	sternotomy	0	23.1	14.5	9.3	Not reported.	Not reported.	Not reported.	teratoma	0	12
23	George Makdisi	PMID: 26234840	2015	USA	20	male	anterior	VATS	0	23	14	5	670	Not reported.	Not reported.	lipofibroadenoma	0	1
24	Jian Ma	PMID: 26137125	2014	China	27	male	posterior	thoracotomy	0	23	15	10	Not reported.	Not reported.	Not reported.	liposarcoma	Not reported.	Not reported.
25	Atanu Goswami	PMID: 26265159	2015	India	68	male	anterior	sternotomy	0	25	20	12	3200	Not reported.	Not reported.	thymolipoma	1	14
26	Miguel J Arrara´s-Martı´nez	PMID:26048590	2015	Spain	68	male	posterior	thoracotomy	0	17.5	13	14	1009	Not reported.	Not reported.	liposarcoma	0	Not reported.
27	Mohsen Sokouti	PMID: 25821300	2013	Iran	35	female	anterior	thoracotomy	0	35	25	9	Not reported.	Not reported.	Not reported.	lymphangioma	0	6
28	Ottavio Rena	PMID: 25837020	2015	Italy	58	male	posterior	combined approach	0	18	9.4	Not reported.	Not reported.	Not reported.	Not reported.	liposarcoma	0	7
29	Andreas Kirschbaum	PMID: 25360405	2013	Germany	35	male	posterior	thoracotomy	0	20	12	Not reported.	Not reported.	Not reported.	Not reported.	schwannoma	1	10
30	Wobbe Bouma	PMID: 25239838	2014	Netherlands	45	male	anterior	sternotomy	0	33	22	4	Not reported.	Not reported.	Not reported.	mesothelial cyst	0	Not reported.
31	Deepali Jain	PMID: 24965215	2015	India	28	male	middle	Not reported.	1	15	12	12	Not reported.	Not reported.	Not reported.	giant cell tumor	Not reported.	Not reported.
32	Prakash Manoharlal Ludhani	PMID: 24887903	2015	India	45	male	middle	thoracotomy	0	35	20	15	3000	Not reported.	Not reported.	solitary fibrous tumour	Not reported.	Not reported.
33	Tevfik Kaplan	PMID: 24887884	2014	Turkey	23	female	middle	thoracotomy	0	20	15	3	1485	Not reported.	Not reported.	thymoma	Not reported.	Not reported.
34	Dimos Karangelis	PMID: 24887835	2014	UK	17	male	posterior	thoracotomy	0	Not reported.	Not reported.	Not reported.	Not reported.	Not reported.	Not reported.	ganglioneuroblastoma	0	5
35	Ferhat Cuce	PMID: 24872484	2014	Turkey	31	male	posterior	Not reported.	0	23	17	15	Not reported.	Not reported.	Not reported.	schwannoma	0	Not reported.
36	Yoshihiro Miyauchi	PMID: 24450351	2013	Japan	15	female	anterior	VATS	0	16	14	13	Not reported.	315	315	teratoma	0	9
37	Usha Dalal	PMID: 24627752	2014	India	20	male	anterior	thoracotomy	0	14	10	Not reported.	Not reported.	Not reported.	Not reported.	teratoma	Not reported.	Not reported.
38	Marcos D. Guimarães	PMID: 23992709	2013	Brazil	49	male	anterior	Not reported.	0	34.3	23.4	14.6	4100	Not reported.	Not reported.	thymolipoma+thymoma	0	7
39	Giuseppe De Luca	PMID: 23857402	2013	Italy	64	female	posterior	thoracotomy	0	15	10	8	Not reported.	Not reported.	Not reported.	giant cell tumor	0	4
40	Bülent Aydemir	PMID: 23826442	2013	Turkey	59	female	middle	sternotomy+clamshell	0	25	18	15	2870	Not reported.	Not reported.	solitary fibrous tumour	1(death)	NA
41	Luke Rothermel	PMID: 23702467	2013	USA	26	female	anterior	VATS	1	10.8	9.4	10	Not reported.	Not reported.	113	teratoma	0	1
42	Jingwei Wang	PMID: 23592909	2013	China	67	female	posterior	thoracotomy	0	16.2	11.8	11	Not reported.	Not reported.	136	schwannoma	Not reported.	Not reported.
43	Jingwei Wang	PMID: 23592909	2013	China	53	female	posterior	thoracotomy	0	18.2	13.8	8.5	Not reported.	Not reported.	145	neurilemmoma	Not reported.	Not reported.
44	Andrea Dell’Amore	PMID: 23625377	2014	Italy	70	male	anterior	VATS	0	13.2	12	11.7	Not reported.	Not reported.	Not reported.	parathyroid_cyst	0	5
45	Mohammed Bouchikh	PMID: 23644714	2013	France	49	female	posterior	sternotomy+thoracotomy	0	28	20	20	5887	Not reported.	Not reported.	desmoid fibromatosis	1	60
46	Toshihiro Matsuo	PMID: 22251823	2011	Japan	52	male	posterior	thoracotomy	1	28	Not reported.	Not reported.	3500	Not reported.	Not reported.	liposarcoma	1	46
47	Osman Fazlıoğulları	PMID: 22309880	2012	Turkey	28	male	anterior	sternotomy	1	17	12	7	640	Not reported.	Not reported.	thymoma	Not reported.	5
48	Tomoyoshi Takenaka	PMID: 22800398	2012	Japan	61	male	middle	sternotomy+thoracotomy	0	18	14.5	11	1350	Not reported.	Not reported.	thymoma	0	Not reported.
49	Xiaogang Zhao	PMID: 22916761	2012	China	38	female	posterior	thoracotomy	Not reported.	25	15	8	Not reported.	Not reported.	Not reported.	periosteal chondroma	Not reported.	6
50	Pier Luigi Filosso	PMID: 22922387	2012	Italy	74	female	middle	thoracotomy	0	14	13	8	Not reported.	Not reported.	Not reported.	thymoma	0	7
51	Yener Aydin	PMID: 25610236	2012	Turkey	23	female	anterior	thoracotomy	0	21	7.5	7	2180	Not reported.	Not reported.	lipofibroadenoma	0	7
52	Rohan G Thakkar	PMID: 21881330	2011	India	43	female	middle	thoracotomy	0	15	14	10.2	Not reported.	Not reported.	Not reported.	solitary fibrous tumour	0	Not reported.
53	Javed Hayat	PMID: 21693453	2011	Pakistan	45	female	posterior	thoracotomy	0	21	14	9	1320	Not reported.	Not reported.	ganglioneuroma	Not reported.	4
54	Shinya Tane	PMID: 21751114	2011	Japan	33	male	anterior	sternotomy	0	11.4	8	6.2	Not reported.	Not reported.	Not reported.	epithelioid angiosarcoma	0	Not reported.
55	Stefan Limmer	PMID: 20040475	2009	Germany	52	male	anterior	thoracotomy	0	18	16	12	1705	Not reported.	Not reported.	thymoma	0	9
56	Ligang Liu	PMID: 20185322, PMID: 20819657	2010	China	44	male	posterior	thoracotomy	0	22	21	20	3560	Not reported.	Not reported.	myxoid liposarcoma	0	13
57	Timuçin Alar	PMID: 21606717	2011	Turkey	26	male	anterior	thoracotomy	0	25	21	8	1580	Not reported.	Not reported.	thymolipoma	0	Not reported.
58	Christos Asteriou	PMID: 21075832	2011	Greece	30	female	anterior	sternotomy	0	15	13.5	11.5	983	Not reported.	Not reported.	teratoma	0	7
59	Masayuki Okuno	PMID: 21170639	2010	Japan	39	female	anterior	sternotomy+thoracotomy (hemiclamshell incision)	0	25	10	5	800	1037	508	liposarcoma	0	14
60	Katsunobu Taki	PMID: 22688481	2011	Japan	39	male	posterior	thoracotomy+laparotomy	0	40	30	15	Not reported.	Not reported.	Not reported.	liposarcoma	0	18
61	Tsuyoshi Shoji	PMID: 19280315	2009	Japan	82	male	posterior	thoracotomy	0	16.3	14.4	5.1	Not reported.	Not reported.	Not reported.	liposarcoma	0	Not reported.
62	Tsuyoshi Shoji	PMID: 19280315	2009	Japan	58	female	posterior	thoracotomy+laparotomy	0	19	15	8.5	Not reported.	Not reported.	Not reported.	liposarcoma	1	Not reported.
63	Jang Wen Su	PMID: 19551295	2009	Singapore	50	male	anterior	thoracotomy	0	13.5	13.1	9.5	Not reported.	Not reported.	Not reported.	peripheral nerve sheath tumour	0	Not reported.
64	Jan De Raet	PMID: 18758314	2008	USA	64	male	anterior	thoracotomy	0	17.5	14	10	Not reported.	Not reported.	Not reported.	solitary fibrous tumor	Not reported.	Not reported.
65	Antonio D'Andrilli	PMID: 17317199	2007	Italy	79	female	anterior	thoracotomy	0	22	16	13	2250	Not reported.	Not reported.	localized fibrous tumors of the pleura	1	9
66	Stefano Santoprete	PMID: 17383375	2006	Italy	73	female	anterior	Clamshell	0	14.5	12.5	12	Not reported.	Not reported.	Not reported.	thymoma	0	11
67	Giuseppe Marulli	PMID: 17473663	2007	Italy	29	female	posterior	thoracotomy	0	28	22	16	4910	Not reported.	Not reported.	liposarcoma	0	11
68	Somshekar Ganti	PMID: 16887035	2006	UK	61	male	anterior	sternotomy	0	25.5	17.5	6.5	1134	Not reported.	Not reported.	hamartoma	0	7
69	Gabriele Di Giammarco	PMID: 15942593	2005	Italy	62	male	anterior	sternotomy	0	21	17	15	2430	Not reported.	Not reported.	liposarcoma	0	5
70	Akira Uno	PMID: 3057681	1988	Japan	67	female	anterior	thoracotomy	0	30	25	21	1880	1774	Not reported.	leiomyoma	0	70
71	L Gasiorowski	PMID: 19670126	2009	Poland	49	female	middle	thoracotomy	0	31	25	Not reported.	3500	Not reported.	Not reported.	liposarcoma	0	6
72	Tsutomu Ohara	PMID: 8298238	1993	Japan	53	male	anterior	sternotomy	1	27	25	12	3620	Not reported.	Not reported.	mesenchymoma	0	Not reported.
73	Majed Al Refai	PMID: 10084519	1999	Italy	48	female	posterior	thoracotomy	0	Not reported.	Not reported.	Not reported.	Not reported.	Not reported.	Not reported.	schwannoma	Not reported.	Not reported.
74	Reza Ershadi	PMID: 30397437	1998	USA	44	male	anterior	sternotomy+thoracotomy	0	26	24	12	Not reported.	Not reported.	Not reported.	solitary fibrous tumor	0	10
75	Goran Kondov	PMID: 28991774	2017	Macedonia	52	female	anterior	thoracotomy	0	19	9	4	Not reported.	Not reported.	Not reported.	cyst	0	4
76	Benjamin Quartey	PMID: 29147246	2011	USA	47	male	posterior	thoracoabdominal approach	0	23	14.5	13.5	2590	Not reported.	Not reported.	schwannoma	0	5
77	Manuchehr Aghajanzadeh	PMID: 24250956	2011	Iran	35	female	anterior	thoracotomy	0	Not reported.	Not reported.	Not reported.	1460	Not reported.	Not reported.	thymolipoma	0	6
78	Marcos Alexandre Balieiro	PMID: 23372956	2013	Brazil	30	male	anterior	Not reported.	0	20	Not reported.	Not reported.	Not reported.	Not reported.	Not reported.	synovial sarcoma	0	13
79	Manouchehr Hekmat	PMID: 27110336	2014	Iran	24	male	middle	sternotomy	0	13	8	5	Not reported.	Not reported.	Not reported.	pericardial cyst	0	5
80	Vishnu R. Mani	PMID: 26410831	2015	USA	28	female	anterior	sternotomy	0	28	19	8	1840	Not reported.	Not reported.	liposarcoma	0	Not reported.
81	Mohammad Vaziri	PMID: 27293949	2016	Iran	40	male	middle	thoracotomy	1	40	33	8	4000	Not reported.	Not reported.	thymolipoma	0	Not reported.
82	Güven Sadi Sunam	PMID: 28824990	2016	Turkey	44	male	middle	thoracotomy	Not reported.	12	7	Not reported.	Not reported.	Not reported.	Not reported.	Ectopic thyroid	0	Not reported.
83	Güven Sadi Sunam	PMID: 28824990	2016	Turkey	31	female	middle	sternotomy	Not reported.	Not reported.	Not reported.	Not reported.	Not reported.	Not reported.	Not reported.	Thymolipoma	0	Not reported.
84	Güven Sadi Sunam	PMID: 28824990	2016	Turkey	22	female	posterior	thoracotomy	Not reported.	17	14	Not reported.	940	Not reported.	Not reported.	teratoma	1	Not reported.
85	Güven Sadi Sunam	PMID: 28824990	2016	Turkey	35	female	anterior	thoracotomy	Not reported.	12	10	Not reported.	Not reported.	Not reported.	Not reported.	Schwannoma	0	Not reported.
86	Güven Sadi Sunam	PMID: 28824990	2016	Turkey	37	female	middle	thoracotomy	Not reported.	Not reported.	Not reported.	Not reported.	Not reported.	Not reported.	Not reported.	Hemangioma	0	Not reported.
87	Güven Sadi Sunam	PMID: 28824990	2016	Turkey	30	female	posterior	thoracotomy	Not reported.	12	6	Not reported.	Not reported.	Not reported.	Not reported.	Ganglioneuroma	0	Not reported.
88	Güven Sadi Sunam	PMID: 28824990	2016	Turkey	37	female	anterior	thoracotomy	Not reported.	11	8	Not reported.	Not reported.	Not reported.	Not reported.	teratoma	1	Not reported.
89	Güven Sadi Sunam	PMID: 28824990	2016	Turkey	34	male	posterior	thoracotomy	Not reported.	13	6	Not reported.	Not reported.	Not reported.	Not reported.	Neurofibroma	0	Not reported.
90	Tatsuya Goto	PMID: 30069400	2018	Japan	29	male	anterior	sternotomy	0	13	11.5	4	939	Not reported.	Not reported.	seminoma	0	7
91	Wei-Li Huang	PMID: 30444993	2019	Taiwan,China	27	female	anterior	VATS	0	10.5	8	4.2	Not reported.	Not reported.	Not reported.	cyst	0	Not reported.
92	Edoardo Virgilio	PMID: 23317594	2013	Italy	32	male	posterior	thoracotomy	0	14	13	Not reported.	Not reported.	Not reported.	Not reported.	Schwannoma	Not reported.	Not reported.
